# Supplementary figures and images for: High-Throughput and Automated Detection of HLA-B*27 Using the LabTurboTM AIO System
Source: MDPI journal article supplement (doi:10.3390/biomedicines11030986), 2023-03-22

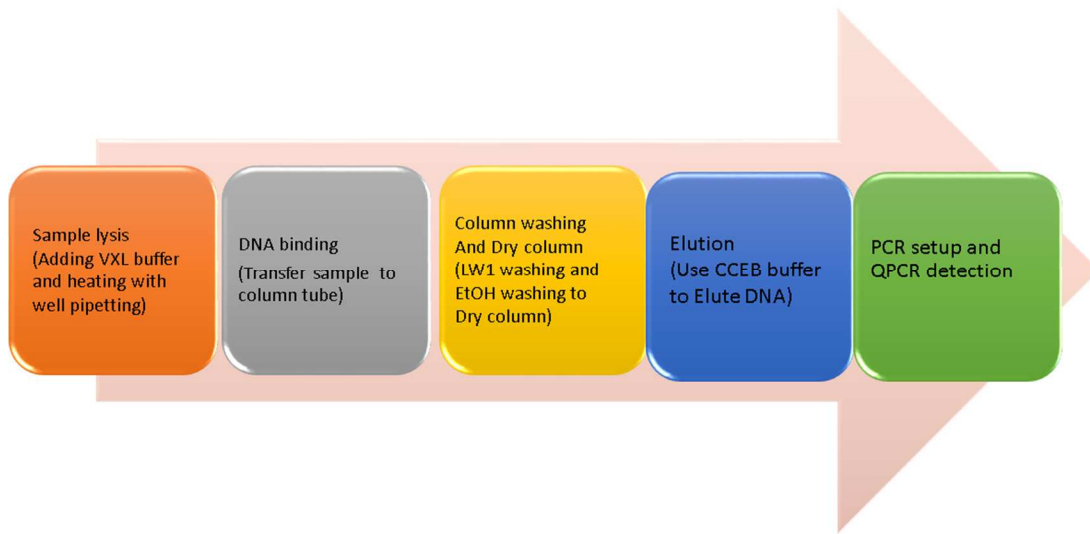

**Figure S1.** Flow chart of automation.

Supplement: s1 [file s1]
